# Supplementary material
Source: publisher figshare collection journal article supplement (https://plos.figshare.com/articles/dataset/_/1230825)
Supplement: Supplementary file 1 [file 1]

Archive with 6 entries (6 files):
- Table_S1.pdf
- Table_S2.pdf
- Table_S3.pdf
- Table_S4.pdf
- Table_S5.pdf
- Checklist_S1.pdf
