# Supplementary material
Source: publisher figshare collection journal article supplement (https://plos.figshare.com/articles/dataset/_/1230825)
Supplement: Supplementary file 1 [file 1 › Table_S2.pdf]

**Table S2. Number and incidence of dengue disease cases in the Philippines: national data.**

| Year | Cases reported (n) |         |        | Incidence (per 100,000 population) |         |       | Source of data. First author, year [Ref] |
|------|--------------------|---------|--------|------------------------------------|---------|-------|------------------------------------------|
|      | DF                 | DHF/DSS | All    | DF                                 | DHF/DSS | All   |                                          |
| 2000 |                    |         | 6614   |                                    |         | 9     | DoH 2000–2005 [25]                       |
| 2000 |                    |         |        |                                    |         | 9*    | DoH 2005–2010 [5]                        |
| 2000 |                    |         | 6614   |                                    |         | 8.7   | FHSIS 2000–2009 [29]                     |
| 2000 |                    |         | 8000   |                                    |         |       | WHO 2008 [6]                             |
| 2000 |                    |         | 8561   |                                    |         |       | WHO 2008 [16]                            |
| 2001 |                    |         | 23,235 |                                    |         | 30    | DoH 2000–2005 [25]                       |
| 2001 |                    |         |        |                                    |         | 30*   | DoH 2005–2010 [5]                        |
| 2001 |                    |         | 23,235 |                                    |         | 29.8  | FHSIS 2000–2009 [29]                     |
| 2001 |                    |         | 23,235 |                                    |         |       | NSCB 2001–2008 [34]                      |
| 2001 |                    |         | 25,216 |                                    |         |       | WHO 2008 [6]                             |
| 2001 |                    |         | 25,002 |                                    |         |       | WHO 2008 [16]                            |
| 2002 |                    |         | 13,187 |                                    |         | 16.6  | DoH 2000–2005 [25]                       |
| 2002 |                    |         | 13,187 |                                    |         | 16.6  | FHSIS 2000–2009 [29]                     |
| 2002 |                    |         | 13,187 |                                    |         |       | NSCB 2001–2008 [34]                      |
| 2002 |                    |         | 16,500 |                                    |         |       | WHO 2008 [6]                             |
| 2002 |                    |         | 16,663 |                                    |         |       | WHO 2008 [16]                            |
| 2003 |                    |         | 22,789 |                                    |         | 28.1  | DoH 2000–2005 [25]                       |
| 2003 | 18,039             | 4750    | 22,789 | 23.0                               | 6.1     |       | FHSIS 2000–2009 [29]                     |
| 2003 |                    |         | 18,039 |                                    |         |       | NSCB 2001–2008 [34]                      |
| 2003 |                    |         | 29,000 |                                    |         |       | WHO 2008 [6]                             |
| 2003 |                    |         | 29,946 |                                    |         |       | WHO 2008 [16]                            |
| 2004 |                    |         |        |                                    |         | 13    | DoH 2005–2010 [5]                        |
| 2004 |                    |         | 15,838 |                                    |         | 19    | DoH 2000–2005 [25]                       |
| 2004 |                    |         | 15,838 |                                    |         | 19.0  | DoH 2011 [26]                            |
| 2004 |                    |         | 15,838 |                                    |         | 19.8  | FHSIS 2000–2009 [29]                     |
| 2004 |                    |         | 15,838 |                                    |         |       | NSCB 2001–2008 [34]                      |
| 2004 |                    |         | 23,000 |                                    |         |       | WHO 2008 [6]                             |
| 2004 |                    |         | 23,040 |                                    |         |       | WHO 2008 [16]                            |
| 2005 |                    |         | 20,107 |                                    |         | 23.6  | DoH 2011 [26]                            |
| 2005 |                    |         | 20,107 |                                    |         | 24    | DoH 2000–2005 [25]                       |
| 2005 |                    | 4092    | 20,107 |                                    | 4.9     | 24.1  | FHSIS 2000–2009 [29]                     |
| 2005 |                    |         | 4092   |                                    |         |       | NSCB 2001–2008 [34]                      |
| 2005 |                    |         | 33,901 |                                    |         |       | WHO 2008 [16]                            |
| 2005 |                    |         | 20,107 |                                    |         | 24.1  | WHO 2012 [21]                            |
| 2005 |                    |         | 33,490 |                                    |         |       | Beatty 2010 [13]                         |
| 2006 |                    | 14,310  | 15,279 |                                    | 17.7    | 19.6  | FHSIS 2000–2009 [29]                     |
| 2006 |                    |         | 15,279 |                                    |         | 19.60 | WHO 2009 [20]                            |
| 2006 |                    |         | 37,101 |                                    |         |       | WHO 2008 [16]                            |

| Year | Cases reported (n) |         |          | Incidence (per 100,000 population) |         |        | Source of data. First author, year [Ref] |
|------|--------------------|---------|----------|------------------------------------|---------|--------|------------------------------------------|
|      | DF                 | DHF/DSS | All      | DF                                 | DHF/DSS | All    |                                          |
| 2006 |                    |         | 37,101   |                                    |         |        | Arima 2011 [33]                          |
| 2006 |                    |         | 36,891   |                                    |         |        | Beatty 2010 [13]                         |
| 2007 |                    | 11,915  | 23,773   |                                    | 14.1    | 28.2   | FHSIS 2000–2009 [29]                     |
| 2007 |                    |         | 11,915   |                                    |         |        | NSCB 2001–2008 [34]                      |
| 2007 |                    |         | 55,135   |                                    |         |        | WHO 2008 [16]                            |
| 2007 |                    |         | 55,639   |                                    |         |        | Arima 2011 [33]                          |
| 2008 |                    | 13,014  |          |                                    | 14.5    |        | FHSIS 2000–2009 [29]                     |
| 2008 |                    |         | 13,014   |                                    |         |        | NSCB 2001–2008 [34]                      |
| 2008 |                    |         | 39,620   |                                    |         |        | WHO 2009 [20]                            |
| 2008 |                    |         | 39,620   |                                    |         |        | Arima 2011 [33]                          |
| 2009 |                    | 5617    |          |                                    | 6.2     |        | FHSIS 2000–2009 [29]                     |
| 2009 |                    |         | 56,545   |                                    |         |        | WHO 2011 [30]                            |
| 2009 |                    |         | 57,819   |                                    |         |        | WHO 2012 [32]                            |
| 2009 |                    |         | 57,819   |                                    |         |        | Arima 2011 [33]                          |
| 2010 |                    |         | 173,033* |                                    |         |        | WHO 2012 [31]                            |
| 2010 |                    |         | 131,976  |                                    |         |        | WHO 2011 [30]                            |
| 2010 |                    |         | 135,355  |                                    |         | 144.55 | Arima 2011 [33]                          |
| 2011 |                    |         | 118,868* |                                    |         |        | WHO 2012 [31]                            |

DF, dengue fever; DHF, dengue haemorrhagic fever; DoH, Department of Health; DSS, dengue shock syndrome; FHSIS, Field Health Surveillance Information System; NSCB, National Statistical Coordination Board; WHO, World Health Organization.

\*Values estimated from graphs.
