# Supplementary material
Source: publisher figshare collection journal article supplement (https://plos.figshare.com/articles/dataset/_/1230825)
Supplement: Supplementary file 1 [file 1 › Table_S3.pdf]

**Table S3. Dengue disease-related deaths and case fatality rate in the Philippines: national data.**

| Year | Death cases (n) |         |                  | CFR (per 100 cases) |         |        | Source of data. First author, year [Ref] |
|------|-----------------|---------|------------------|---------------------|---------|--------|------------------------------------------|
|      | DF              | DHF/DSS | All              | DF                  | DHF/DSS | All    |                                          |
| 2000 |                 |         |                  |                     |         | 0.5%*  | DoH 2005–2010 [5]                        |
| 2000 |                 |         | 386              |                     |         |        | DoH 2000–2005 [25]                       |
| 2000 |                 |         |                  |                     |         | 0.9%   | WHO 2008 [6]                             |
| 2000 |                 |         |                  |                     |         | 0.8%   | WHO 2008 [16]                            |
| 2001 |                 |         | 641              |                     |         |        | DoH 2000–2005 [25]                       |
| 2001 |                 |         | 214 <sup>†</sup> |                     |         |        | DoH 2011 [27]                            |
| 2001 |                 |         | 177              |                     |         | 0.75%  | WHO 2008 [6]                             |
| 2001 |                 |         |                  |                     |         | 0.7%   | WHO 2008 [16]                            |
| 2002 |                 |         | 576              |                     |         |        | DoH 2011 [28]                            |
| 2002 |                 |         | 576              |                     |         |        | DoH 2000–2005 [25]                       |
| 2002 |                 |         |                  |                     |         | 1.1%   | WHO 2008 [6]                             |
| 2002 |                 |         |                  |                     |         | 1.1%   | WHO 2008 [16]                            |
| 2003 |                 |         | 831              |                     |         |        | DoH 2011 [28]                            |
| 2003 |                 |         | 831              |                     |         |        | DoH 2000–2005 [25]                       |
| 2003 |                 |         | 282 <sup>†</sup> |                     |         |        | DoH 2011 [27]                            |
| 2003 |                 |         |                  |                     |         | 0.8%   | WHO 2008 [6]                             |
| 2003 |                 |         |                  |                     |         | 0.8%   | WHO 2008 [16]                            |
| 2004 |                 |         | 761              |                     |         |        | DoH 2011 [28]                            |
| 2004 |                 |         |                  |                     |         | 1.7%   | DoH 2005–2010 [5]                        |
| 2004 |                 |         | 761              |                     |         |        | DoH 2000–2005 [25]                       |
| 2004 |                 |         | 256 <sup>†</sup> |                     |         |        | DoH 2011 [27]                            |
| 2004 |                 |         |                  |                     |         | 1.1%   | WHO 2008 [6]                             |
| 2004 |                 |         |                  |                     |         | 1.0%   | WHO 2008 [16]                            |
| 2005 |                 |         | 887              |                     |         |        | DoH 2011 [28]                            |
| 2005 |                 |         | 887              |                     |         |        | DoH 2000–2005 [25]                       |
| 2005 |                 |         | 320 <sup>†</sup> |                     |         |        | DoH 2011 [27]                            |
| 2005 |                 |         |                  |                     |         | 1.2%   | WHO 2008 [16]                            |
| 2006 |                 |         | 1017             |                     |         |        | DoH 2011 [28]                            |
| 2006 |                 |         | 349 <sup>†</sup> |                     |         |        | DoH 2011 [27]                            |
| 2006 |                 |         | 131 <sup>‡</sup> |                     |         |        | DoH 2011 [27]                            |
| 2006 |                 |         |                  |                     |         | 1.0%   | WHO 2008 [16]                            |
| 2006 |                 |         | 378              |                     |         | 1.02%  | Arima 2011 [33]                          |
| 2007 |                 |         |                  |                     |         | 0.9%   | WHO 2008 [16]                            |
| 2007 |                 |         | 533              |                     |         | 0.96%  | Arima 2011 [33]                          |
| 2008 |                 |         | 373              |                     |         |        | WHO 2009 [20]                            |
| 2008 |                 |         | 373              |                     |         | 0.94%  | Arima 2011 [33]                          |
| 2009 |                 |         | 548              |                     |         |        | WHO 2012 [32]                            |
| 2009 |                 |         | 548              |                     |         | 0.95%  | Arima 2011 [33]                          |
| 2010 |                 |         | 788              |                     |         | 0.6%   | WHO 2011 [30]                            |
| 2010 |                 |         | 793              |                     |         | 0.94%  | Arima 2011 [33]                          |
| 2011 |                 |         | 639*             |                     |         | 0.54%* | WHO 2012 [31]                            |

CFR, case fatality rate; DF, dengue fever; DHF, dengue haemorrhagic fever; DoH, Department of Health; DSS, dengue shock syndrome; WHO, World Health Organization.

\*Values estimated from graphs.

†Cases in children (5–9 years old only).

‡Cases in children (10–14 years old only).
