# Supplementary material
Source: publisher figshare collection journal article supplement (https://plos.figshare.com/articles/dataset/_/1230825)
Supplement: Supplementary file 1 [file 1 › Table_S4.pdf]

**Table S4. Number and incidence of dengue disease in the Philippines.**

(A) Regional data; (B) outbreak data from Field Epidemiology Training Program Fellows' reports; (C) outbreak data from Regional Surveillance Units reports.

| Year              | Region                                | DF     |                                             | DF mortality |            | Source of data.<br>First author, year<br>[Ref] |
|-------------------|---------------------------------------|--------|---------------------------------------------|--------------|------------|------------------------------------------------|
|                   |                                       | n      | Incidence<br>(per<br>100,000<br>population) | n            | CFR<br>(%) |                                                |
| (A) Regional data |                                       |        |                                             |              |            |                                                |
| 1996–2005         | NCR                                   |        | 0.367–<br>20.358                            |              |            | Su 2008 [62]                                   |
| 1997–2008         | Rural Guba, Cebu<br>City (Region VII) | 33,771 |                                             | 831          |            | Edillo 2009 [3: ]                              |
| 2000              | NCR                                   | 2565   | 25                                          | 111          | 1.1        | DoH 2000–2005<br>[27]                          |
| 2000              | NCR                                   | 2565   | 24.7                                        |              |            | FHSIS 2000–2009<br>[2; ]                       |
| 2000              | CAR                                   | 125    | 9                                           | 5            | 0.4        | DoH 2000–2005<br>[27]                          |
| 2000              | CAR                                   | 125    | 8.9                                         |              |            | FHSIS 2000–2009<br>[2; ]                       |
| 2000              | Region I                              | 316    | 8                                           | 20           | 0.5        | DoH 2000–2005<br>[27]                          |
| 2000              | Region I                              | 316    | 7.6                                         |              |            | FHSIS 2000–2009<br>[2; ]                       |
| 2000              | Region II                             | 127    | 5                                           | 7            | 0.2        | DoH 2000–2005<br>[27]                          |
| 2000              | Region II                             | 127    | 4.5                                         |              |            | FHSIS 2000–2009<br>[2; ]                       |
| 2000              | Region III                            | 740    | 10                                          | 42           | 0.5        | DoH 2000–2005<br>[27]                          |
| 2000              | Region III                            | 740    | 9.6                                         |              |            | FHSIS 2000–2009<br>[2; ]                       |
| 2000              | Region IV                             | 947    | 8                                           | 70           | 0.6        | DoH 2000–2005<br>[27]                          |
| 2000              | Region IV                             | 947    | 8.4                                         |              |            | FHSIS 2000–2009<br>[2; ]                       |
| 2000              | Region V                              | 335    | 7                                           | 14           | 0.3        | DoH 2000–2005<br>[27]                          |
| 2000              | Region V                              | 335    | 7                                           |              |            | FHSIS 2000–2009<br>[2; ]                       |
| 2000              | Region VI                             | 72     | 1                                           | 14           | 0.2        | DoH 2000–2005<br>[27]                          |

| Year | Region      | DF   |                                             | DF mortality |            | Source of data.<br>First author, year<br>[Ref] |
|------|-------------|------|---------------------------------------------|--------------|------------|------------------------------------------------|
|      |             | n    | Incidence<br>(per<br>100,000<br>population) | n            | CFR<br>(%) |                                                |
| 2000 | Region VI   | 72   | 1.1                                         |              |            | FHSIS 2000–2009<br>[2; ]                       |
| 2000 | Region VII  | 464  | 8                                           | 49           | 0.9        | DoH 2000–2005<br>[27]                          |
| 2000 | Region VII  | 464  | 8.4                                         |              |            | FHSIS 2000–2009<br>[2; ]                       |
| 2000 | Region VIII | 242  | 7                                           | 10           | 0.3        | DoH 2000–2005<br>[27]                          |
| 2000 | Region VIII | 242  | 6.5                                         |              |            | FHSIS 2000–2009<br>[2; ]                       |
| 2000 | Region IX   | 161  | 5                                           | 6            | 0.2        | DoH 2000–2005<br>[27]                          |
| 2000 | Region IX   | 161  | 5.1                                         |              |            | FHSIS 2000–2009<br>[2; ]                       |
| 2000 | Region X    | 92   | 3                                           | 9            | 0.3        | DoH 2000–2005<br>[27]                          |
| 2000 | Region X    | 92   | 3.3                                         |              |            | FHSIS 2000–2009<br>[2; ]                       |
| 2000 | Region XI   | 55   | 1                                           | 15           | 0.3        | DoH 2000–2005<br>[27]                          |
| 2000 | Region XI   | 55   | 1.1                                         |              |            | FHSIS 2000–2009<br>[2; ]                       |
| 2000 | Region XII  | 335  | 13                                          | 10           | 0.4        | DoH 2000–2005<br>[27]                          |
| 2000 | Region XII  | 335  | 12.6                                        |              |            | FHSIS 2000–2009<br>[2; ]                       |
| 2000 | Region XIII | 21   | 1                                           | 4            | 0.2        | DoH 2000–2005<br>[27]                          |
| 2000 | Region XIII | 21   | 1                                           |              |            | FHSIS 2000–2009<br>[2; ]                       |
| 2000 | ARMM        | 17   | 1                                           | 0            | 0          | DoH 2000–2005<br>[27]                          |
| 2000 | ARMM        | 17   | 0.8                                         |              |            | FHSIS 2000–2009<br>[2; ]                       |
| 2001 | NCR         |      |                                             | 121          |            | DoH 2011 [2; ]                                 |
| 2001 | NCR         | 4941 | 47                                          | 121          | 1.1        | DoH 2000–2005<br>[27]                          |
| 2001 | NCR         | 4941 | 46.7                                        |              |            | FHSIS 2000–2009<br>[2; ]                       |
| 2001 | CAR         |      |                                             | 9            |            | DoH 2011 [2; ]                                 |

| Year | Region      | DF   |                                             | DF mortality |            | Source of data.<br>First author, year<br>[Ref] |
|------|-------------|------|---------------------------------------------|--------------|------------|------------------------------------------------|
|      |             | n    | Incidence<br>(per<br>100,000<br>population) | n            | CFR<br>(%) |                                                |
| 2001 | CAR         | 1555 | 108                                         | 9            | 0.6        | DoH 2000–2005<br>[27]                          |
| 2001 | CAR         | 1555 | 108.4                                       |              |            | FHSIS 2000–2009<br>[2; ]                       |
| 2001 | Region I    |      |                                             | 36           |            | DoH 2011 [2: ]                                 |
| 2001 | Region I    | 739  | 18                                          | 36           | 0.9        | DoH 2000–2005<br>[27]                          |
| 2001 | Region I    | 739  | 17.5                                        |              |            | FHSIS 2000–2009<br>[2; ]                       |
| 2001 | Region II   |      |                                             | 14           |            | DoH 2011 [2: ]                                 |
| 2001 | Region II   | 791  | 28                                          | 14           | 0.5        | DoH 2000–2005<br>[27]                          |
| 2001 | Region II   | 791  | 27.7                                        |              |            | FHSIS 2000–2009<br>[2; ]                       |
| 2001 | Region III  |      |                                             | 65           |            | DoH 2011 [2: ]                                 |
| 2001 | Region III  | 2566 | 33                                          | 65           | 0.8        | DoH 2000–2005<br>[27]                          |
| 2001 | Region III  | 2566 | 32.7                                        |              |            | FHSIS 2000–2009<br>[2; ]                       |
| 2001 | Region IV   |      |                                             | 119          |            | DoH 2011 [2: ]                                 |
| 2001 | Region IV   | 1833 | 16                                          | 119          | 1          | DoH 2000–2005<br>[27]                          |
| 2001 | Region IV   | 1833 | 15.8                                        |              |            | FHSIS 2000–2009<br>[2; ]                       |
| 2001 | Region V    |      |                                             | 23           |            | DoH 2011 [2: ]                                 |
| 2001 | Region V    | 614  | 13                                          | 23           | 0.5        | DoH 2000–2005<br>[27]                          |
| 2001 | Region V    | 614  | 12.7                                        |              |            | FHSIS 2000–2009<br>[2; ]                       |
| 2001 | Region VI   |      |                                             | 18           |            | DoH 2011 [2: ]                                 |
| 2001 | Region VI   | 2220 | 35                                          | 18           | 0.3        | DoH 2000–2005<br>[27]                          |
| 2001 | Region VI   | 2220 | 34.5                                        |              |            | FHSIS 2000–2009<br>[2; ]                       |
| 2001 | Region VII  |      |                                             | 114          |            | DoH 2011 [2: ]                                 |
| 2001 | Region VII  | 2512 | 45                                          | 114          | 2          | DoH 2000–2005<br>[27]                          |
| 2001 | Region VII  | 2512 | 44.5                                        |              |            | FHSIS 2000–2009<br>[2; ]                       |
| 2001 | Region VIII |      |                                             | 21           |            | DoH 2011 [2: ]                                 |

| Year      | Region            | DF     |                                             | DF mortality |            | Source of data.<br>First author, year<br>[Ref] |
|-----------|-------------------|--------|---------------------------------------------|--------------|------------|------------------------------------------------|
|           |                   | n      | Incidence<br>(per<br>100,000<br>population) | n            | CFR<br>(%) |                                                |
| 2001      | Region VIII       | 1558   | 41                                          | 21           | 0.5        | DoH 2000–2005<br>[27]                          |
| 2001      | Region VIII       | 1558   | 40.7                                        |              |            | FHSIS 2000–2009<br>[2; ]                       |
| 2001      | Region IX         |        |                                             | 13           |            | DoH 2011 [2: ]                                 |
| 2001      | Region IX         | 987    | 31                                          | 13           | 0.4        | DoH 2000–2005<br>[27]                          |
| 2001      | Region IX         | 987    | 30.6                                        |              |            | FHSIS 2000–2009<br>[2; ]                       |
| 2001      | Region X          |        |                                             | 15           |            | DoH 2011 [2: ]                                 |
| 2001      | Region X          | 1712   | 60                                          | 15           | 0.5        | DoH 2000–2005<br>[27]                          |
| 2001      | Region X          | 1712   | 60.4                                        |              |            | FHSIS 2000–2009<br>[2; ]                       |
| 2001      | Region XI         |        |                                             | 45           |            | DoH 2011 [25]                                  |
| 2001      | Region XI         | 75     | 1                                           | 45           | 0.8        | DoH 2000–2005<br>[27]                          |
| 2001      | Region XI         | 75     | 1.4                                         |              |            | FHSIS 2000–2009<br>[2; ]                       |
| 2001      | Region XII        |        |                                             | 12           |            | DoH 2011 [2: ]                                 |
| 2001      | Region XII        | 767    | 28                                          | 12           | 0.4        | DoH 2000–2005<br>[27]                          |
| 2001      | Region XII        | 767    | 28.2                                        |              |            | FHSIS 2000–2009<br>[2; ]                       |
| 2001      | Region XIII       |        |                                             | 13           |            | DoH 2011 [2: ]                                 |
| 2001      | Region XIII       | 295    | 13                                          | 13           | 0.6        | DoH 2000–2005<br>[27]                          |
| 2001      | Region XIII       | 295    | 13.2                                        |              |            | FHSIS 2000–2009<br>[2; ]                       |
| 2001      | ARMM              |        |                                             | 3            |            | DoH 2011 [2: ]                                 |
| 2001      | ARMM              | 70     | 3                                           | 3            | 0.1        | DoH 2000–2005<br>[27]                          |
| 2001      | ARMM              | 70     | 3.1                                         |              |            | FHSIS 2000–2009<br>[2; ]                       |
| 2002–2007 | Cebu (Region VII) | 17,675 |                                             | 442          |            | Edillo 2008 [39]                               |
| 2002      | NCR               |        |                                             | 88           |            | DoH 2011 [2: ]                                 |
| 2002      | NCR               | 2526   | 24                                          | 88           | 0.8        | DoH 2000–2005<br>[27]                          |
| 2002      | NCR               | 2526   | 23.5                                        |              |            | FHSIS 2000–2009<br>[2; ]                       |
| 2002      | CAR               |        |                                             | 3            |            | DoH 2011 [2: ]                                 |

| Year | Region      | DF   |                                             | DF mortality |            | Source of data.<br>First author, year<br>[Ref] |
|------|-------------|------|---------------------------------------------|--------------|------------|------------------------------------------------|
|      |             | n    | Incidence<br>(per<br>100,000<br>population) | n            | CFR<br>(%) |                                                |
| 2002 | CAR         | 104  | 7                                           | 3            | 0.2        | DoH 2000–2005<br>[27]                          |
| 2002 | CAR         | 104  | 7.1                                         |              |            | FHSIS 2000–2009<br>[2; ]                       |
| 2002 | Region I    |      |                                             | 16           |            | DoH 2011 [2: ]                                 |
| 2002 | Region I    | 81   | 2                                           | 16           | 0.4        | DoH 2000–2005<br>[27]                          |
| 2002 | Region I    | 81   | 1.9                                         |              |            | FHSIS 2000–2009<br>[2; ]                       |
| 2002 | Region II   |      |                                             | 12           |            | DoH 2011 [2: ]                                 |
| 2002 | Region II   | 862  | 30                                          | 12           | 0.4        | DoH 2000–2005<br>[27]                          |
| 2002 | Region II   | 862  | 29.6                                        |              |            | FHSIS 2000–2009<br>[2; ]                       |
| 2002 | Region III  |      |                                             | 22           |            | DoH 2011 [2: ]                                 |
| 2002 | Region III  | 598  | 7                                           | 22           | 0.3        | DoH 2000–2005<br>[27]                          |
| 2002 | Region III  | 598  | 7.3                                         |              |            | FHSIS 2000–2009<br>[2; ]                       |
| 2002 | Region IV   |      |                                             | 85           |            | DoH 2011 [2: ]                                 |
| 2002 | Region IV   | 1562 | 13                                          | 85           | 0.7        | DoH 2000–2005<br>[27]                          |
| 2002 | Region IV   | 1562 | 13.3                                        |              |            | FHSIS 2000–2009<br>[2; ]                       |
| 2002 | Region V    |      |                                             | 36           |            | DoH 2011 [2: ]                                 |
| 2002 | Region V    | 521  | 11                                          | 36           | 0.7        | DoH 2000–2005<br>[27]                          |
| 2002 | Region V    | 521  | 10.6                                        |              |            | FHSIS 2000–2009<br>[2; ]                       |
| 2002 | Region VI   |      |                                             | 29           |            | DoH 2011 [2: ]                                 |
| 2002 | Region VI   | 2618 | 40                                          | 29           | 0.4        | DoH 2000–2005<br>[27]                          |
| 2002 | Region VI   | 2618 | 40.0                                        |              |            | FHSIS 2000–2009<br>[2; ]                       |
| 2002 | Region VII  |      |                                             | 107          |            | DoH 2011 [2: ]                                 |
| 2002 | Region VII  | 744  | 13                                          | 107          | 1.9        | DoH 2000–2005<br>[27]                          |
| 2002 | Region VII  | 744  | 12.9                                        |              |            | FHSIS 2000–2009<br>[2; ]                       |
| 2002 | Region VIII |      |                                             | 20           |            | DoH 2011 [2: ]                                 |

| Year | Region      | DF   |                                             | DF mortality |            | Source of data.<br>First author, year<br>[Ref] |
|------|-------------|------|---------------------------------------------|--------------|------------|------------------------------------------------|
|      |             | n    | Incidence<br>(per<br>100,000<br>population) | n            | CFR<br>(%) |                                                |
| 2002 | Region VIII | 922  | 24                                          | 20           | 0.5        | DoH 2000–2005<br>[27]                          |
| 2002 | Region VIII | 922  | 23.6                                        |              |            | FHSIS 2000–2009<br>[2; ]                       |
| 2002 | Region IX   |      |                                             | 10           |            | DoH 2011 [2: ]                                 |
| 2002 | Region IX   | 623  | 21                                          | 10           | 0.3        | DoH 2000–2005<br>[27]                          |
| 2002 | Region IX   | 623  | 20.5                                        |              |            | FHSIS 2000–2009<br>[2; ]                       |
| 2002 | Region X    |      |                                             | 26           |            | DoH 2011 [2: ]                                 |
| 2002 | Region X    | 796  | 28                                          | 26           | 0.9        | DoH 2000–2005<br>[27]                          |
| 2002 | Region X    | 796  | 27.5                                        |              |            | FHSIS 2000–2009<br>[2; ]                       |
| 2002 | Region XI   |      |                                             | 98           |            | DoH 2011 [2: ]                                 |
| 2002 | Region XI   | 516  | 9                                           | 98           | 1.8        | DoH 2000–2005<br>[27]                          |
| 2002 | Region XI   | 516  | 9.4                                         |              |            | FHSIS 2000–2009<br>[2; ]                       |
| 2002 | Region XII  |      |                                             | 8            |            | DoH 2011 [2: ]                                 |
| 2002 | Region XII  | 483  | 17                                          | 8            | 0.3        | DoH 2000–2005<br>[27]                          |
| 2002 | Region XII  | 483  | 17.3                                        |              |            | FHSIS 2000–2009<br>[2; ]                       |
| 2002 | Region XIII |      |                                             | 15           |            | DoH 2011 [2: ]                                 |
| 2002 | Region XIII | 213  | 9                                           | 15           | 0.7        | DoH 2000–2005<br>[27]                          |
| 2002 | Region XIII | 213  | 9.3                                         |              |            | FHSIS 2000–2009<br>[2; ]                       |
| 2002 | ARMM        |      |                                             | 1            |            | DoH 2011 [2: ]                                 |
| 2002 | ARMM        | 18   | 1                                           | 1            | 0          | DoH 2000–2005<br>[27]                          |
| 2002 | ARMM        | 18   | 0.8                                         |              |            | FHSIS 2000–2009<br>[2; ]                       |
| 2003 | NCR         |      |                                             | 148          |            | DoH 2011 [2: ]                                 |
| 2003 | NCR         | 3001 | 28                                          | 9            | 0.6        | DoH 2000–2005<br>[27]                          |
| 2003 | NCR         | 3017 | 27.6                                        |              |            | FHSIS 2000–2009<br>[2; ]                       |
| 2003 | CAR         |      |                                             | 9            |            | DoH 2011 [2: ]                                 |

| Year | Region      | DF   |                                             | DF mortality |            | Source of data.<br>First author, year<br>[Ref] |
|------|-------------|------|---------------------------------------------|--------------|------------|------------------------------------------------|
|      |             | n    | Incidence<br>(per<br>100,000<br>population) | n            | CFR<br>(%) |                                                |
| 2003 | CAR         |      | 0                                           | 30           | 0.7        | DoH 2000–2005<br>[27]                          |
| 2003 | Region I    |      |                                             | 30           |            | DoH 2011 [2: ]                                 |
| 2003 | Region I    | 874  | 20                                          | 13           | 0.4        | DoH 2000–2005<br>[27]                          |
| 2003 | Region I    | 874  | 20.1                                        |              |            | FHSIS 2000–2009<br>[2; ]                       |
| 2003 | Region II   |      |                                             | 13           |            | DoH 2011 [2: ]                                 |
| 2003 | Region II   | 1060 | 36                                          | 66           | 0.8        | DoH 2000–2005<br>[27]                          |
| 2003 | Region II   | 1044 | 35.2                                        |              |            | FHSIS 2000–2009<br>[2; ]                       |
| 2003 | Region III  |      |                                             | 66           |            | DoH 2011 [2: ]                                 |
| 2003 | Region III  | 1882 | 23                                          | 100          | 1          | DoH 2000–2005<br>[27]                          |
| 2003 | Region III  | 1882 | 22.6                                        |              |            | FHSIS 2000–2009<br>[2; ]                       |
| 2003 | Region IV   |      |                                             | 100          |            | DoH 2011 [2: ]                                 |
| 2003 | Region IV-A | 1757 | 18                                          | 16           | 0.7        | DoH 2000–2005<br>[27]                          |
| 2003 | Region IV-A | 1757 | 18.2                                        |              |            | FHSIS 2000–2009<br>[2; ]                       |
| 2003 | Region IV-B | 221  | 9                                           | 43           | 0.9        | DoH 2000–2005<br>[27]                          |
| 2003 | Region IV-B | 221  | 9.2                                         |              |            | FHSIS 2000–2009<br>[2; ]                       |
| 2003 | Region V    |      |                                             | 16           |            | DoH 2011 [2: ]                                 |
| 2003 | Region V    | 546  | 11                                          | 18           | 0.3        | DoH 2000–2005<br>[27]                          |
| 2003 | Region V    | 546  | 10.9                                        |              |            | FHSIS 2000–2009<br>[2; ]                       |
| 2003 | Region VI   |      |                                             | 43           |            | DoH 2011 [2: ]                                 |
| 2003 | Region VI   | 779  | 12                                          | 100          | 1.7        | DoH 2000–2005<br>[27]                          |
| 2003 | Region VI   | 779  | 11.7                                        |              |            | FHSIS 2000–2009<br>[2; ]                       |
| 2003 | Region VII  |      |                                             | 18           |            | DoH 2011 [2: ]                                 |
| 2003 | Region VII  | 1555 | 27                                          | 21           | 0.5        | DoH 2000–2005<br>[27]                          |
| 2003 | Region VII  | 1555 | 26.5                                        |              |            | FHSIS 2000–2009<br>[2; ]                       |

| Year | Region      | DF   |                                             | DF mortality |            | Source of data.<br>First author, year<br>[Ref] |
|------|-------------|------|---------------------------------------------|--------------|------------|------------------------------------------------|
|      |             | n    | Incidence<br>(per<br>100,000<br>population) | n            | CFR<br>(%) |                                                |
| 2003 | Region VIII |      |                                             | 100          |            | DoH 2011 [2: ]                                 |
| 2003 | Region VIII | 1008 | 25                                          | 9            | 0.3        | DoH 2000–2005<br>[27]                          |
| 2003 | Region VIII | 1008 | 25.3                                        |              |            | FHSIS 2000–2009<br>[2; ]                       |
| 2003 | Region IX   |      |                                             | 21           |            | DoH 2011 [2: ]                                 |
| 2003 | Region IX   | 841  | 28                                          | 61           | 1.6        | DoH 2000–2005<br>[27]                          |
| 2003 | Region IX   | 841  | 27.0                                        |              |            | FHSIS 2000–2009<br>[2; ]                       |
| 2003 | Region X    |      |                                             | 9            |            | DoH 2011 [2: ]                                 |
| 2003 | Region X    | 321  | 8                                           | 109          | 2.8        | DoH 2000–2005<br>[27]                          |
| 2003 | Region X    | 321  | 8.4                                         |              |            | FHSIS 2000–2009<br>[2; ]                       |
| 2003 | Region XI   |      |                                             | 61           |            | DoH 2011 [2: ]                                 |
| 2003 | Region XI   | 3464 | 88                                          | 61           | 1.8        | DoH 2000–2005<br>[27]                          |
| 2003 | Region XI   | 3464 | 88.1                                        |              |            | FHSIS 2000–2009<br>[2; ]                       |
| 2003 | Region XII  |      |                                             | 109          |            | DoH 2011 [2: ]                                 |
| 2003 | Region XII  | 614  | 18                                          | 21           | 0.9        | DoH 2000–2005<br>[27]                          |
| 2003 | Region XII  | 614  | 17.2                                        |              |            | FHSIS 2000–2009<br>[2; ]                       |
| 2003 | Region XIII |      |                                             | 61           |            | DoH 2011 [2: ]                                 |
| 2003 | Region XIII | 116  | 5                                           | 6            | 0.2        | DoH 2000–2005<br>[27]                          |
| 2003 | Region XIII | 116  | 5.0                                         |              |            | FHSIS 2000–2009<br>[2; ]                       |
| 2003 | ARMM        |      |                                             | 21           |            | DoH 2011 [2: ]                                 |
| 2003 | ARMM        |      |                                             | 9            | 0.6        | DoH 2000–2005<br>[27]                          |
| 2003 | Foreign     |      |                                             | 6            |            | DoH 2011 [2: ]                                 |
| 2004 | NCR         |      |                                             | 131          |            | DoH 2011 [2: ]                                 |
| 2004 | NCR         | 1957 | 18                                          | 131          | 1.2        | DoH 2000–2005<br>[27]                          |
| 2004 | NCR         | 1957 | 17.7                                        |              |            | FHSIS 2000–2009<br>[2; ]                       |
| 2004 | CAR         |      |                                             | 2            |            | DoH 2011 [2: ]                                 |

| Year | Region      | DF     |                                             | DF mortality |            | Source of data.<br>First author, year<br>[Ref] |
|------|-------------|--------|---------------------------------------------|--------------|------------|------------------------------------------------|
|      |             | n      | Incidence<br>(per<br>100,000<br>population) | n            | CFR<br>(%) |                                                |
| 2004 | CAR         |        | 0                                           | 2            | 0.1        | DoH 2000–2005<br>[27]                          |
| 2004 | Region I    |        |                                             | 31           |            | DoH 2011 [2: ]                                 |
| 2004 | Region I    | 569    | 12                                          | 31           | 0.7        | DoH 2000–2005<br>[27]                          |
| 2004 | Region II   |        |                                             | 9            |            | DoH 2011 [2: ]                                 |
| 2004 | Region II   | 504    | 17                                          | 9            | 0.3        | DoH 2000–2005<br>[27]                          |
| 2004 | Region III  |        |                                             | 60           |            | DoH 2011 [2: ]                                 |
| 2004 | Region III  | 1728   | 19                                          | 60           | 0.7        | DoH 2000–2005<br>[27]                          |
| 2004 | Region III  | 1728   | 20.3                                        |              |            | FHSIS 2000–2009<br>[2; ]                       |
| 2004 | Region IV   |        |                                             | 89           |            | DoH 2011 [2: ]                                 |
| 2004 | Region IV-A | 848    | 8                                           | 89           | 0.9        | DoH 2000–2005<br>[27]                          |
| 2004 | Region IV-A | 848    | 8.5                                         |              |            | FHSIS 2000–2009<br>[2; ]                       |
| 2004 | Region IV-B | 111    | 4                                           | 11           | 0.4        | DoH 2000–2005<br>[27]                          |
| 2004 | Region V    |        |                                             | 11           |            | DoH 2011 [2: ]                                 |
| 2004 | Region V    | 767    | 15                                          | 22           | 0.4        | DoH 2000–2005<br>[27]                          |
| 2004 | Region V    | 767    |                                             |              |            | FHSIS 2000–2009<br>[2; ]                       |
| 2004 | Region VI   |        |                                             | 22           |            | DoH 2011 [2: ]                                 |
| 2004 | Region VI   | 12,265 | 19                                          | 32           | 0.5        | DoH 2000–2005<br>[27]                          |
| 2004 | Region VI   | 1265   | 18.5                                        |              |            | FHSIS 2000–2009<br>[2; ]                       |
| 2004 | Region VI   |        |                                             | 32           |            | DoH 2011 [2: ]                                 |
| 2004 | Region VI   | 752    | 12                                          | 59           | 0.9        | DoH 2000–2005<br>[27]                          |
| 2004 | Region VI   | 752    | 12.6                                        |              |            | FHSIS 2000–2009<br>[2; ]                       |
| 2004 | Region VIII |        |                                             | 59           |            | DoH 2011 [2: ]                                 |
| 2004 | Region VIII | 969    | 25                                          | 20           | 0.5        | DoH 2000–2005<br>[27]                          |
| 2004 | Region IX   |        |                                             | 20           |            | DoH 2011 [2: ]                                 |
| 2004 | Region IX   | 566    | 19                                          | 16           | 0.5        | DoH 2000–2005<br>[27]                          |

| Year | Region      | DF   |                                             | DF mortality |            | Source of data.<br>First author, year<br>[Ref] |
|------|-------------|------|---------------------------------------------|--------------|------------|------------------------------------------------|
|      |             | n    | Incidence<br>(per<br>100,000<br>population) | n            | CFR<br>(%) |                                                |
| 2004 | Region X    |      |                                             | 16           |            | DoH 2011 [2: ]                                 |
| 2004 | Region X    | 1256 | 33                                          | 59           | 1.5        | DoH 2000–2005<br>[27]                          |
| 2004 | Region X    | 1256 | 32.2                                        |              |            | FHSIS 2000–2009<br>[2; ]                       |
| 2004 | Region XI   |      |                                             | 59           |            | DoH 2011 [2: ]                                 |
| 2004 | Region XI   | 3891 | 98                                          | 126          | 3.2        | DoH 2000–2005<br>[27]                          |
| 2004 | Region XI   | 3891 | 97.0                                        |              |            | FHSIS 2000–2009<br>[2; ]                       |
| 2004 | Region XII  |      |                                             | 126          |            | DoH 2011 [2: ]                                 |
| 2004 | Region XII  | 993  | 29                                          | 56           | 1.7        | DoH 2000–2005<br>[27]                          |
| 2004 | Region XII  | 993  | 27.2                                        |              |            | FHSIS 2000–2009<br>[2; ]                       |
| 2004 | Region XIII |      |                                             | 56           |            | DoH 2011 [2: ]                                 |
| 2004 | Region XIII | 1097 | 48                                          | 36           | 1.6        | DoH 2000–2005<br>[27]                          |
| 2004 | Region XIII | 1097 | 45.8                                        |              |            | FHSIS 2000–2009<br>[2; ]                       |
| 2004 | ARMM        |      |                                             | 36           |            | DoH 2011 [2: ]                                 |
| 2004 | ARMM        |      |                                             | 2            | 0.1        | DoH 2000–2005<br>[27]                          |
| 2004 | Foreign     |      |                                             | 2            |            | DoH 2011 [2: ]                                 |
| 2005 | NCR         |      |                                             | 185          |            | DoH 2011 [2: ]                                 |
| 2005 | NCR         | 2102 | 20                                          | 185          | 1.7        | DoH 2000–2005<br>[27]                          |
| 2005 | NCR         | 2102 | 18.7                                        |              |            | FHSIS 2000–2009<br>[2; ]                       |
| 2005 | CAR         |      |                                             | 14           |            | DoH 2011 [2: ]                                 |
| 2005 | CAR         |      |                                             | 14           | 0.9        | DoH 2000–2005<br>[27]                          |
| 2005 | Region I    |      |                                             | 34           |            | DoH 2011 [25]                                  |
| 2005 | Region I    |      |                                             | 34           | 0.7        | DoH 2000–2005<br>[27]                          |
| 2005 | Region II   |      |                                             | 16           |            | DoH 2011 [2: ]                                 |
| 2005 | Region II   |      |                                             | 16           | 0.5        | DoH 2000–2005<br>[27]                          |
| 2005 | Region III  |      |                                             | 66           |            | DoH 2011 [2: ]                                 |

| Year | Region      | DF   |                                             | DF mortality |            | Source of data.<br>First author, year<br>[Ref] |
|------|-------------|------|---------------------------------------------|--------------|------------|------------------------------------------------|
|      |             | n    | Incidence<br>(per<br>100,000<br>population) | n            | CFR<br>(%) |                                                |
| 2005 | Region III  | 2320 | 25                                          | 66           | 0.7        | DoH 2000–2005<br>[27]                          |
| 2005 | Region III  | 2320 | 26.9                                        |              |            | FHSIS 2000–2009<br>[2; ]                       |
| 2005 | Region IV   |      |                                             | 78           |            | DoH 2011 [2: ]                                 |
| 2005 | Region IV-A |      |                                             | 78           | 0.7        | DoH 2000–2005<br>[27]                          |
| 2005 | Region IV-B |      |                                             | 9            | 0.3        | DoH 2000–2005<br>[27]                          |
| 2005 | Region IV-B | 351  | 6.8                                         |              |            | FHSIS 2000–2009<br>[2; ]                       |
| 2005 | Region V    |      |                                             | 9            |            | DoH 2011 [2: ]                                 |
| 2005 | Region V    | 351  | 68                                          | 16           | 0.3        | DoH 2000–2005<br>[27]                          |
| 2005 | Region VI   |      |                                             | 16           |            | DoH 2011 [2: ]                                 |
| 2005 | Region VI   | 2270 | 33                                          | 38           | 0.6        | DoH 2000–2005<br>[27]                          |
| 2005 | Region VII  |      |                                             | 38           |            | DoH 2011 [2: ]                                 |
| 2005 | Region VII  | 1500 | 24                                          | 138          | 2.2        | DoH 2000–2005<br>[27]                          |
| 2005 | Region VII  | 1500 | 24.7                                        |              |            | FHSIS 2000–2009<br>[2; ]                       |
| 2005 | Region VIII |      |                                             | 138          |            | DoH 2011 [2: ]                                 |
| 2005 | Region VIII |      |                                             | 10           | 0.2        | DoH 2000–2005<br>[27]                          |
| 2005 | Region IX   |      |                                             | 10           |            | DoH 2011 [2: ]                                 |
| 2005 | Region IX   | 2568 | 84                                          | 28           | 0.9        | DoH 2000–2005<br>[27]                          |
| 2005 | Region IX   | 2568 | 78.8                                        |              |            | FHSIS 2000–2009<br>[2; ]                       |
| 2005 | Region X    |      |                                             | 28           |            | DoH 2011 [2: ]                                 |
| 2005 | Region X    | 2792 | 71                                          | 96           | 2.4        | DoH 2000–2005<br>[27]                          |
| 2005 | Region X    | 2792 | 70.5                                        |              |            | FHSIS 2000–2009<br>[2; ]                       |
| 2005 | Region XI   |      |                                             | 96           |            | DoH 2011 [2: ]                                 |
| 2005 | Region XI   | 2814 | 70                                          | 77           | 1.9        | DoH 2000–2005<br>[27]                          |
| 2005 | Region XI   | 2814 | 68.7                                        |              |            | FHSIS 2000–2009<br>[2; ]                       |
| 2005 | Region XII  |      |                                             | 77           |            | DoH 2011 [2: ]                                 |

| Year | Region                        | DF   |                                             | DF mortality |            | Source of data.<br>First author, year<br>[Ref] |
|------|-------------------------------|------|---------------------------------------------|--------------|------------|------------------------------------------------|
|      |                               | n    | Incidence<br>(per<br>100,000<br>population) | n            | CFR<br>(%) |                                                |
| 2005 | Region XII                    | 3044 | 88                                          | 45           | 1.3        | DoH 2000–2005<br>[27]                          |
| 2005 | Region XII                    | 3044 | 81.2                                        |              |            | FHSIS 2000–2009<br>[2; ]                       |
| 2005 | Region XIII                   |      |                                             | 45           |            | DoH 2011 [2: ]                                 |
| 2005 | Region XIII                   | 622  | 27                                          | 23           | 1          | DoH 2000–2005<br>[27]                          |
| 2005 | ARMM                          |      |                                             | 23           |            | DoH 2011 [2: ]                                 |
| 2005 | ARMM                          |      |                                             | 14           | 0.4        | DoH 2000–2005<br>[27]                          |
| 2005 | Foreign                       |      |                                             | 14           |            | DoH 2011 [2: ]                                 |
| 2005 | Quezon City<br>Hospital (NCR) | 6    |                                             |              |            | Contreras 2009 [37]                            |
| 2006 | NCR                           |      |                                             | 185          |            | DoH 2011 [2: ]                                 |
| 2006 | NCR                           | 2755 | 19.6                                        |              |            | FHSIS 2000–2009<br>[2; ]                       |
| 2006 | CAR                           |      |                                             | 345          |            | DoH 2011 [2: ]                                 |
| 2006 | Region I                      |      |                                             | 7            |            | DoH 2011 [2: ]                                 |
| 2006 | Region I                      | 1002 | 22                                          |              |            | FHSIS 2000–2009<br>[2; ]                       |
| 2006 | Region II                     |      |                                             | 46           |            | DoH 2011 [2: ]                                 |
| 2006 | Region II                     | 549  | 17.6                                        |              |            | FHSIS 2000–2009<br>[2; ]                       |
| 2006 | Region III                    |      |                                             | 32           |            | DoH 2011 [2: ]                                 |
| 2006 | Region III                    | 2481 | 37.2                                        |              |            | FHSIS 2000–2009<br>[2; ]                       |
| 2006 | Region IV                     |      |                                             | 110          |            | DoH 2011 [2: ]                                 |
| 2006 | Region IV-A                   | 1848 | 17.6                                        |              |            | FHSIS 2000–2009<br>[2; ]                       |
| 2006 | Region IV-B                   | 255  | 10.1                                        |              |            | FHSIS 2000–2009<br>[2; ]                       |
| 2006 | Region V                      |      |                                             | 158          |            | DoH 2011 [2: ]                                 |
| 2006 | Region VI                     |      |                                             | 11           |            | DoH 2011 [2: ]                                 |
| 2006 | Region VII                    |      |                                             | 14           |            | DoH 2011 [2: ]                                 |
| 2006 | Region VII                    | 1681 | 27.2                                        |              |            | FHSIS 2000–2009<br>[2; ]                       |
| 2006 | Region VIII                   |      |                                             | 39           |            | DoH 2011 [28]                                  |
| 2006 | Region IX                     |      |                                             | 100          |            | DoH 2011 [28]                                  |
| 2006 | Region IX                     | 896  | 26.9                                        |              |            | FHSIS 2000–2009<br>[29]                        |

| Year | Region                        | DF   |                                             | DF mortality |            | Source of data.<br>First author, year<br>[Ref] |
|------|-------------------------------|------|---------------------------------------------|--------------|------------|------------------------------------------------|
|      |                               | n    | Incidence<br>(per<br>100,000<br>population) | n            | CFR<br>(%) |                                                |
| 2006 | Region X                      |      |                                             | 12           |            | DoH 2011 [28]                                  |
| 2006 | Region XI                     |      |                                             | 17           |            | DoH 2011 [28]                                  |
| 2006 | Region XI                     | 997  | 23.9                                        |              |            | FHSIS 2000–2009<br>[29]                        |
| 2006 | Region XII                    |      |                                             | 42           |            | DoH 2011 [28]                                  |
| 2006 | Region XII                    | 1473 | 38.3                                        |              |            | FHSIS 2000–2009<br>[29]                        |
| 2006 | Region XIII                   |      |                                             | 33           |            | DoH 2011 [28]                                  |
| 2006 | ARMM                          |      |                                             | 36           |            | DoH 2011 [28]                                  |
| 2006 | Foreign                       |      |                                             | 8            |            | DoH 2011 [28]                                  |
| 2006 | Quezon City<br>Hospital (NCR) | 84   |                                             |              |            | Contreras 2009 [35]                            |
| 2007 | NCR                           | 3036 | 26.3                                        |              |            | FHSIS 2000–2009<br>[29]                        |
| 2007 | Region I                      | 705  | 15.5                                        |              |            | FHSIS 2000–2009<br>[29]                        |
| 2007 | Region III                    | 1388 | 14.3                                        |              |            | FHSIS 2000–2009<br>[29]                        |
| 2007 | Region IV-A                   | 3037 | 25.9                                        |              |            | FHSIS 2000–2009<br>[29]                        |
| 2007 | Region VII                    | 4331 | 67.7                                        |              |            | FHSIS 2000–2009<br>[29]                        |
| 2007 | Region IX                     | 1609 | 49.8                                        |              |            | FHSIS 2000–2009<br>[29]                        |
| 2007 | Region X                      | 1442 | 36.5                                        |              |            | FHSIS 2000–2009<br>[29]                        |
| 2007 | Region XI                     | 2380 | 57.3                                        |              |            | FHSIS 2000–2009<br>[29]                        |
| 2007 | Region XII                    | 2473 | 64.7                                        |              |            | FHSIS 2000–2009<br>[29]                        |
| 2007 | Region XIII                   | 1097 | 47.8                                        |              |            | FHSIS 2000–2009<br>[29]                        |
| 2007 | Quezon City<br>Hospital (NCR) | 20   |                                             |              |            | Contreras 2009 [35]                            |
| 2008 | NCR                           | 3927 | 34.9                                        |              |            | FHSIS 2000–2009<br>[29]                        |
| 2008 | Region I                      | 1775 | 35.7                                        |              |            | FHSIS 2000–2009<br>[29]                        |
| 2008 | Region III                    | 2931 | 30.0                                        |              |            | FHSIS 2000–2009<br>[29]                        |

| Year  | Region                        | DF     |                                             | DF mortality |            | Source of data.<br>First author, year<br>[Ref] |
|-------|-------------------------------|--------|---------------------------------------------|--------------|------------|------------------------------------------------|
|       |                               | n      | Incidence<br>(per<br>100,000<br>population) | n            | CFR<br>(%) |                                                |
| 2008  | Region IV-A                   | 2097   | 18.4                                        |              |            | FHSIS 2000–2009<br>[29]                        |
| 2008  | Region VII                    | 1284   | 19.0                                        |              |            | FHSIS 2000–2009<br>[29]                        |
| 2008  | Region X                      | 260    | 6.2                                         |              |            | FHSIS 2000–2009<br>[29]                        |
| 2008  | Region XI                     | 3671   | 101.0                                       |              |            | FHSIS 2000–2009<br>[29]                        |
| 2008  | Quezon City<br>Hospital (NCR) | 28     |                                             |              |            | Contreras 2009 [35]                            |
| 2009  | NCR                           | 2348   | 20.6                                        |              |            | FHSIS 2000–2009<br>[29]                        |
| 2009  | CAR                           | 324    | 19.5                                        |              |            | FHSIS 2000–2009<br>[29]                        |
| 2009  | Region I                      | 226    | 4.5                                         |              |            | FHSIS 2000–2009<br>[29]                        |
| 2009  | Region IV-A                   | 1510   | 13.0                                        |              |            | FHSIS 2000–2009<br>[29]                        |
| 2009  | Region VII                    | 547    | 7.9                                         |              |            | FHSIS 2000–2009<br>[29]                        |
| 2009  | Region VIII                   | 1011   | 23.2                                        |              |            | FHSIS 2000–2009<br>[29]                        |
| 2009  | Region XI                     | 3799   | 102.8                                       |              |            | FHSIS 2000–2009<br>[29]                        |
| 2009  | Quezon City<br>Hospital (NCR) | 21     |                                             |              |            | Contreras 2009 [35]                            |
| 2010* | Region I                      | 3451   |                                             | 32           | 0.93       | DoH 2011 [36]                                  |
| 2010* | Region II                     | 1451   |                                             | 17           | 1.17       | DoH 2011 [36]                                  |
| 2010* | Region III                    | 3529   |                                             | 27           | 0.77       | DoH 2011 [36]                                  |
| 2010* | Region IV-A                   | 11,872 |                                             | 50           | 0.42       | DoH 2011 [36]                                  |
| 2010* | Region IV-B                   | 1915   |                                             | 19           | 0.99       | DoH 2011 [36]                                  |
| 2010* | Region V                      | 1630   |                                             | 9            | 0.55       | DoH 2011 [36]                                  |
| 2010* | Region VI                     | 17,593 |                                             | 84           | 0.48       | DoH 2011 [36]                                  |
| 2010* | Region VII                    | 6717   |                                             | 46           | 0.68       | DoH 2011 [36]                                  |
| 2010* | Region VIII                   | 7361   |                                             | 74           | 1.01       | DoH 2011 [36]                                  |
| 2010* | Region IX                     | 2516   |                                             | 34           | 1.35       | DoH 2011 [36]                                  |
| 2010* | Region X                      | 5368   |                                             | 55           | 1.02       | DoH 2011 [36]                                  |
| 2010* | Region XI                     | 6057   |                                             | 47           | 0.78       | DoH 2011 [36]                                  |
| 2010* | Region XII                    | 8293   |                                             | 42           | 0.51       | DoH 2011 [36]                                  |
| 2010* | ARMM                          | 1043   |                                             | 12           | 1.15       | DoH 2011 [36]                                  |

| Year  | Region                    | DF     |                                             | DF mortality |            | Source of data.<br>First author, year<br>[Ref] |
|-------|---------------------------|--------|---------------------------------------------|--------------|------------|------------------------------------------------|
|       |                           | n      | Incidence<br>(per<br>100,000<br>population) | n            | CFR<br>(%) |                                                |
| 2010* | CAR                       | 4074   |                                             | 8            | 0.2        | DoH 2011 [36]                                  |
| 2010* | Region XIII               | 2113   |                                             | 8            | 0.38       | DoH 2011 [36]                                  |
| 2010* | NCR                       | 9720   |                                             | 56           | 0.58       | DoH 2011 [36]                                  |
| 2010* | Kalookan City<br>(NCR)    | 1187   |                                             | 5            | 0.42       | DoH 2011 [36]                                  |
| 2010* | Las Pinas City<br>(NCR)   | 149    |                                             | 2            | 1.34       | DoH 2011 [36]                                  |
| 2010* | Makati City (NCR)         | 206    |                                             | 0            |            | DoH 2011 [36]                                  |
| 2010* | Malabon City<br>(NCR)     | 546    |                                             | 3            | 0.55       | DoH 2011 [36]                                  |
| 2010* | Mandaluyong City<br>(NCR) | 343    |                                             | 1            | 0.29       | DoH 2011 [36]                                  |
| 2010* | Manila City (NCR)         | 1374   |                                             | 9            | 0.66       | DoH 2011 [36]                                  |
| 2010* | Marikina City<br>(NCR)    | 368    |                                             | 2            | 0.54       | DoH 2011 [36]                                  |
| 2010* | Muntinlupa City<br>(NCR)  | 203    |                                             | 0            |            | DoH 2011 [36]                                  |
| 2010* | Navotas City (NCR)        | 497    |                                             | 3            | 0.6        | DoH 2011 [36]                                  |
| 2010* | Paranaque City<br>(NCR)   | 418    |                                             | 0            |            | DoH 2011 [36]                                  |
| 2010* | Pasay City (NCR)          | 296    |                                             | 1            | 0.34       | DoH 2011 [36]                                  |
| 2010* | Pasig City (NCR)          | 373    |                                             | 1            | 0.27       | DoH 2011 [36]                                  |
| 2010* | Pateros (NCR)             | 25     |                                             | 0            |            | DoH 2011 [36]                                  |
| 2010* | Quezon City (NCR)         | 2569   |                                             | 2            | 0.82       | DoH 2011 [36]                                  |
| 2010* | San Juan City<br>(NCR)    | 151    |                                             | 0            |            | DoH 2011 [36]                                  |
| 2010* | Taguig City (NCR)         | 275    |                                             | 2            | 0.73       | DoH 2011 [36]                                  |
| 2010* | Valenzuela City<br>(NCR)  | 740    |                                             | 6            | 0.81       | DoH 2011 [36]                                  |
| 2011* | NCR                       | 15,427 |                                             | 93           | 0.60       | DoH 2011 [36]                                  |
| 2011* | CAR                       | 1940   |                                             | 9            | 0.46       | DoH 2011 [36]                                  |
| 2011* | Region I                  | 9494   |                                             | 58           | 0.61       | DoH 2011 [36]                                  |
| 2011* | Region II                 | 4773   |                                             | 27           | 0.57       | DoH 2011 [36]                                  |
| 2011* | Region III                | 13,347 |                                             | 33           | 0.25       | DoH 2011 [36]                                  |
| 2011* | Region IV-A               | 10,215 |                                             | 56           | 0.55       | DoH 2011 [36]                                  |
| 2011* | Region IV-B               | 1072   |                                             | 4            | 0.37       | DoH 2011 [36]                                  |
| 2011* | Region V                  | 532    |                                             | 7            | 1.32       | DoH 2011 [36]                                  |
| 2011* | Region VI                 | 2281   |                                             | 28           | 1.23       | DoH 2011 [36]                                  |
| 2011* | Region VII                | 3264   |                                             | 19           | 0.58       | DoH 2011 [36]                                  |
| 2011* | Region VIII               | 564    |                                             | 4            | 0.71       | DoH 2011 [36]                                  |

| Year              | Region                                          | DF   |                                             | DF mortality |            | Source of data.<br>First author, year<br>[Ref] |
|-------------------|-------------------------------------------------|------|---------------------------------------------|--------------|------------|------------------------------------------------|
|                   |                                                 | n    | Incidence<br>(per<br>100,000<br>population) | n            | CFR<br>(%) |                                                |
| 2011*             | Region IX                                       | 836  |                                             | 12           | 1.44       | DoH 2011 [36]                                  |
| 2011*             | Region X                                        | 1293 |                                             | 4            | 0.31       | DoH 2011 [36]                                  |
| 2011*             | Region XI                                       | 2509 |                                             | 18           | 0.72       | DoH 2011 [36]                                  |
| 2011*             | Region XII                                      | 1764 |                                             | 16           | 0.91       | DoH 2011 [36]                                  |
| 2011*             | Region XIII                                     | 753  |                                             | 4            | 0.53       | DoH 2011 [36]                                  |
| 2011*             | ARMM                                            | 140  |                                             | 4            | 2.86       | DoH 2011 [36]                                  |
| 2011*             | Kalookan City<br>(NCR)                          | 1941 |                                             | 11           | 0.57       | DoH 2011 [36]                                  |
| 2011*             | Las Pinas City<br>(NCR)                         | 406  |                                             | 2            | 0.49       | DoH 2011 [36]                                  |
| 2011*             | Makati City (NCR)                               | 317  |                                             | 4            | 1.26       | DoH 2011 [36]                                  |
| 2011*             | Malabon City<br>(NCR)                           | 795  |                                             | 3            | 0.38       | DoH 2011 [36]                                  |
| 2011*             | Mandaluyong City<br>(NCR)                       | 320  |                                             | 1            | 0.31       | DoH 2011 [36]                                  |
| 2011*             | Manila City (NCR)                               | 1944 |                                             | 7            | 0.36       | DoH 2011 [36]                                  |
| 2011*             | Marikina City<br>(NCR)                          | 377  |                                             | 1            | 0.27       | DoH 2011 [36]                                  |
| 2011*             | Muntinlupa City<br>(NCR)                        | 397  |                                             | 2            | 0.5        | DoH 2011 [36]                                  |
| 2011*             | Navotas City (NCR)                              | 497  |                                             | 3            | 0.6        | DoH 2011 [36]                                  |
| 2011*             | Paranaque City<br>(NCR)                         | 671  |                                             | 3            | 0.45       | DoH 2011 [36]                                  |
| 2011*             | Pasay City (NCR)                                | 378  |                                             | 0            |            | DoH 2011 [36]                                  |
| 2011*             | Pasig City (NCR)                                | 838  |                                             | 4            | 0.48       | DoH 2011 [36]                                  |
| 2011*             | Pateros (NCR)                                   | 103  |                                             | 0            |            | DoH 2011 [36]                                  |
| 2011*             | Quezon City (NCR)                               | 4611 |                                             | 32           | 0.69       | DoH 2011 [36]                                  |
| 2011*             | San Juan City<br>(NCR)                          | 208  |                                             | 0            |            | DoH 2011 [36]                                  |
| 2011*             | Taguig City (NCR)                               | 534  |                                             | 6            | 1.12       | DoH 2011 [36]                                  |
| 2011*             | Valenzuela City<br>(NCR)                        | 1090 |                                             | 14           | 1.28       | DoH 2011 [36]                                  |
| 2011 <sup>†</sup> | Calabarzon: Cavite<br>province (Region<br>IV-A) | 929  |                                             | 5            | 0.54       | NDRRMC 2011<br>[39]                            |
| 2011 <sup>†</sup> | Calabarzon: Laguna<br>province (Region<br>IV-A) | 1666 |                                             | 2            | 0.12       | NDRRMC 2011<br>[39]                            |

| Year                                                                | Region                                            | DF   |                                             | DF mortality |            | Source of data.<br>First author, year<br>[Ref] |
|---------------------------------------------------------------------|---------------------------------------------------|------|---------------------------------------------|--------------|------------|------------------------------------------------|
|                                                                     |                                                   | n    | Incidence<br>(per<br>100,000<br>population) | n            | CFR<br>(%) |                                                |
| 2011 <sup>†</sup>                                                   | Calabarzon:<br>Batangas province<br>(Region IV-A) | 1621 |                                             | 11           | 0.68       | NDRRMC 2011<br>[39]                            |
| 2011 <sup>†</sup>                                                   | Calabarzon: Rizal<br>province (Region<br>IV-A)    | 1777 |                                             | 9            | 0.51       | NDRRMC 2011<br>[39]                            |
| 2011 <sup>†</sup>                                                   | Calabarzon: Quezon<br>province (Region<br>IV-A)   | 785  |                                             | 6            | 0.76       | NDRRMC 2011<br>[39]                            |
| <b>(B) Local outbreak data from dengue disease Fellows' reports</b> |                                                   |      |                                             |              |            |                                                |
| 2001 (April–<br>July)                                               | Benguet, CAR                                      | 165  |                                             |              |            | DoH 2012 [23]                                  |
| 2001 (22<br>May–22 June)                                            | San Miguel, Bulacan<br>(Region III)               | 7    |                                             | 0            |            | DoH 2012 [23]                                  |
| 2003 (26<br>April–30 June)                                          | Wao, Lanao del Sur<br>(ARMM)                      | 80   |                                             | 2            | 2          | DoH 2012 [23]                                  |
| 2003 (8 June–<br>22 July)                                           | Alfonso XII,<br>Quezon, Palawan<br>(Region IV)    | 21   |                                             |              |            | DoH 2012 [23]                                  |
| 2010 (Jan–<br>Sept)<br>(11 July–<br>21 Aug) <sup>‡</sup>            | Zamboanga City<br>(Region IX)                     | 2122 |                                             | 22           | 1.04       | DoH 2012 [23]                                  |
| 2010 (Jan–<br>July)                                                 | Digos City, Davao<br>del Sur (Region XI)          | 367  |                                             | 9            | 2.5        | DoH 2012 [23]                                  |
| 2011 (Feb–<br>July)                                                 | Batanes province<br>(Region II)                   | 701  |                                             | 1            | 0.14       | DoH 2012 [23]                                  |
| <b>(C) Local outbreak data from Regional Surveillance Units</b>     |                                                   |      |                                             |              |            |                                                |
| 2000 (Jan)                                                          | Baguio City (CAR)                                 | 2    |                                             | 0            |            | DoH 2012 [23]                                  |
| 2000 (Apr–<br>Jul)                                                  | Munoz, Nueva Ecija<br>(Region III)                | 17   |                                             |              |            | DoH 2012 [23]                                  |
| 2000 (May–<br>Aug)                                                  | Gen Tinio Nueva<br>Ecija (Region III)             | 37   |                                             | 0            |            | DoH 2012 [23]                                  |
| 2000 (June–<br>Aug)                                                 | Gapan, Nueva Ecija<br>(Region III)                | 34   |                                             |              | 2–6        | DoH 2012 [23]                                  |
| 2000 (Nov–<br>Dec)                                                  | Cantilan, Surigao<br>del Sur (Region XI)          | 9    |                                             |              |            | DoH 2012 [23]                                  |
| 2001 (Jan–<br>30 June)                                              | Ifugao (CAR)                                      | 44   |                                             | 0            |            | DoH 2012 [23]                                  |
| 2001 (June–<br>31 July)                                             | Abra (CAR)                                        | 61   |                                             | 0            |            | DoH 2012 [23]                                  |

| Year                | Region                                  | DF  |                                             | DF mortality |            | Source of data.<br>First author, year<br>[Ref] |
|---------------------|-----------------------------------------|-----|---------------------------------------------|--------------|------------|------------------------------------------------|
|                     |                                         | n   | Incidence<br>(per<br>100,000<br>population) | n            | CFR<br>(%) |                                                |
| 2001 (July 2001)    | Batangas Regional Hospital (Region IV)  | 41  |                                             |              |            | DoH 2012 [23]                                  |
| 2002 (Jan–31 March) | Zamboanga City (Region IX)              | 75  |                                             |              |            | DoH 2012 [23]                                  |
| 2002 (20 Apr–8 May) | Loakan, Baguio City (CAR)               | 9   |                                             | 0            |            | DoH 2012 [23]                                  |
| 2002 (2–19 June)    | Balud, Masbate (Region V)               | 24  |                                             |              |            | DoH 2012 [23]                                  |
| 2002 (June–July)    | Cebu (Region VII)                       | 13  |                                             |              | 2–15       | DoH 2012 [23]                                  |
| 2002 (1 June–6 Aug) | Mountain province (CAR)                 | 56  |                                             |              |            | DoH 2012 [23]                                  |
| 2003 (Jan–5 Sept)   | Valenzuela City (NCR)                   | 226 |                                             | 3            | 1.3        | DoH 2012 [23]                                  |
| 2003 (3 Sept–5 Oct) | Mambajao, Camiguin (Region X)           | 13  |                                             | 1            | 8          | DoH 2012 [23]                                  |
| 2004 (Jan–8 Mar)    | Guiuan, Eastern Samar (Region VII)      | 34  |                                             |              |            | DoH 2012 [23]                                  |
| 2004 (Jan–9 July)   | Bislig, Butuan City (Region X)          | 78  |                                             | 6            | 7.6        | DoH 2012 [23]                                  |
| 2004 (May)          | La Trinidad, Benguet (CAR)              | 52  |                                             | 0            |            | DoH 2012 [23]                                  |
| 2005 (May–July)     | Pag-asa, Quezon City (NCR)              | 42  |                                             | 5            | 12         | DoH 2012 [23]                                  |
| 2006 (5 Oct–24 Nov) | Cabuyao, Laguna (Region IV)             | 38  |                                             | 4            | 11         | DoH 2012 [23]                                  |
| 2007 (Jan–23 June)  | Hinobaan, Negros Occidental (Region VI) | 68  |                                             | 3            | 4.4        | DoH 2012 [23]                                  |
| 2007 (Jan–5 July)   | Sipalay, Negros Occidental (Region VI)  | 145 |                                             | 0            |            | DoH 2012 [23]                                  |
| 2007 (Jan–July)     | Don Carlos, Bukidnon (Region X)         | 142 |                                             | 3            | 2.11       | DoH 2012 [23]                                  |
| 2007 (Jan–Oct)      | Surigao City (Region X)                 | 164 |                                             | 3            | 1.8        | DoH 2012 [23]                                  |

| Year                      | Region                                        | DF  |                                             | DF mortality |            | Source of data.<br>First author, year<br>[Ref] |
|---------------------------|-----------------------------------------------|-----|---------------------------------------------|--------------|------------|------------------------------------------------|
|                           |                                               | n   | Incidence<br>(per<br>100,000<br>population) | n            | CFR<br>(%) |                                                |
| 2007<br>(15 May–<br>June) | San Agustin, Iba,<br>Zambales<br>(Region III) | 24  |                                             | 1            | 4.2        | DoH 2012 [23]                                  |
| 2007 (June)               | Matnog, Sorsogon<br>(Region V)                | 25  |                                             | 1            | 4          | DoH 2012 [23]                                  |
| 2007 (4 July–<br>30 July) | Northern Samar<br>(Region VII)                | 562 |                                             | 3            | 0.5        | DoH 2012 [23]                                  |
| 2007 (Jul–<br>8 Aug)      | General Santos City<br>(Region XI)            | 115 |                                             | 5            | 4          | DoH 2012 [23]                                  |
| 2008 (Jan–<br>28 July)    | Calasiao,<br>Pangasinan<br>(Region I)         | 56  |                                             | 1            | 1.8        | DoH 2012 [23]                                  |
| 2008 (Mar–<br>5 July)     | Paracelis, Mt.<br>Province (CAR)              | 56  |                                             | 2            | 3.6        | DoH 2012 [23]                                  |
| 2008 (1 July–<br>4 Aug)   | San Mateo, Rizal<br>(Region IV)               | 17  |                                             | 2            | 12         | DoH 2012 [23]                                  |
| 2009 (Jan–<br>5 Sept)     | Tabuk, Kalinga<br>(CAR)                       | 400 |                                             | 3            | 0.8        | DoH 2012 [23]                                  |
| 2009 (Jan–<br>Sept)       | Lagawe, Ifugao<br>(CAR)                       | 171 |                                             | 2            | 1.2        | DoH 2012 [23]                                  |
| 2010 (4 Jan–<br>11 June)  | Banisilan, North<br>Cotabato<br>(Region XII)  | 137 |                                             | 4            | 2.9        | DoH 2012 [23]                                  |

ARMM, Autonomous Region in Muslim Mindanao; CAR, Cordillera Administrative Region; CFR, case fatality rate; DF, dengue fever; DoH, Department of Health; FHSIS, Field Health Service Information System; NCR, National Capital Region; NDRRMC, National Disaster Risk Reduction and Management Council.

\*1 January to 10 September, 2010 or 2011.

†January to August, 2011.

‡Ongoing outbreak
