# Supplementary material
Source: publisher figshare collection journal article supplement (https://plos.figshare.com/articles/dataset/_/1230825)
Supplement: Supplementary file 1 [file 1 › Table_S5.pdf]

|                                      | <1 year | 1–4 years | 0–4 years | 5–14 years | 15–49 years | 50–64 years | ≥65 years | Unknown | Total      |
|--------------------------------------|---------|-----------|-----------|------------|-------------|-------------|-----------|---------|------------|
| 2002                                 |         |           |           |            |             |             |           |         |            |
| 2003                                 | 47      | 231       | 278       | 364        | 154         | 14          | 21        |         | 1109       |
| 2004                                 | 38      | 183       | 221       | 363        | 147         | 16          | 13        | 1       | 982        |
| 2005                                 | 33      | 209       | 242       | 439        | 162         | 23          | 21        |         | 1129       |
| 2006                                 |         |           |           |            |             |             |           |         |            |
| 2007                                 |         |           |           |            |             |             |           |         |            |
| 2008                                 |         |           |           |            |             |             |           |         |            |
| 2009                                 |         |           |           |            |             |             |           |         |            |
| 2010                                 |         |           |           |            |             |             |           |         |            |
| <b>Population, n (DoH and NSCB*)</b> |         |           |           |            |             |             |           |         |            |
| 2000*                                |         |           | 9,902,800 | 18,643,400 | 39,256,800  | 6,196,100   | 2,947,400 |         | 76,946,500 |
| 2001                                 |         |           |           |            |             |             |           |         |            |
| 2002                                 |         |           |           |            |             |             |           |         |            |
| 2003                                 |         |           | 9,633,446 | 18,463,076 | 42,245,087  | 7,295,749   | 3,416,946 |         | 81,054,304 |
| 2004                                 |         |           | 9,646,113 | 18,616,264 | 43,212,678  | 7,574,917   | 3,586,589 |         | 82,636,561 |
| 2005                                 |         |           | 9,658,747 | 18,769,032 | 44,231,550  | 7,853,322   | 3,728,690 |         | 84,241,341 |



|                                        | <1 year | 1–4 years | 0–4 years | 5–14 years | 15–49 years | 50–64 years | ≥65 years | Unknown | Total |
|----------------------------------------|---------|-----------|-----------|------------|-------------|-------------|-----------|---------|-------|
| 2010                                   |         |           |           |            |             |             |           |         |       |
| <b>Case fatality rate (calculated)</b> |         |           |           |            |             |             |           |         |       |
| 2000                                   |         |           |           |            |             |             |           |         |       |
| 2001                                   |         |           |           |            |             |             |           |         |       |
| 2002                                   |         |           |           |            |             |             |           |         |       |
| 2003                                   | 0.41    | 0.36      | 0.37      | 0.18       | 0.09        | 0.13        | 0.42      |         | 0.23  |
| 2004                                   |         |           |           |            |             |             |           |         |       |
| 2005                                   | 0.24    | 0.31      | 0.29      | 0.23       | 0.13        | 0.17        | 0.95      |         | 0.28  |
| 2006                                   |         |           |           |            |             |             |           |         |       |
| 2007                                   |         |           |           |            |             |             |           |         |       |
| 2008                                   |         |           |           |            |             |             |           |         |       |
| 2009                                   |         |           |           |            |             |             |           |         |       |
| 2010                                   |         |           |           |            |             |             |           |         |       |

Population data from: <http://www.doh.gov.ph/kp/statistics/demography1.html>. Empty cells: data not provided.

DF, dengue fever; DHF, dengue haemorrhagic fever; DoH, Department of Health; FHSIS, Field Health Service Information System; NSCB, National Statistical Coordination Board. \*[http://www.nscb.gov.ph/secstat/d\\_popnProj.asp](http://www.nscb.gov.ph/secstat/d_popnProj.asp).
